# Supplementary material for: Concordance of programmed death-ligand 1 expression between primary and metastatic non-small cell lung cancer by immunohistochemistry and RNA in situ hybridization
Source: PubMed Central journal article supplement (PMC5675629; doi:10.18632/oncotarget.20254), 2017-08-14

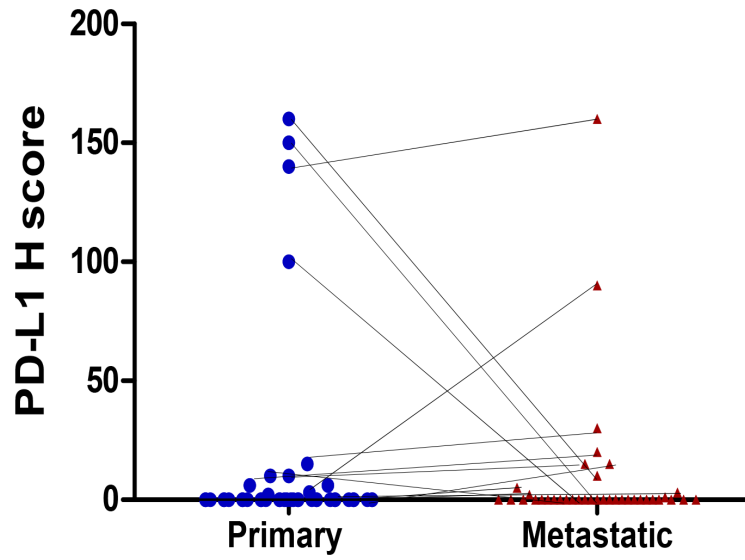

Supplement: oncotarget-08-87234-s001.pdf [file oncotarget-08-87234-s001.pdf]
